# Supplementary material
Source: Springer Nature journal article supplement (http://www.springermedizin.de/resource/supplementary/12933_2007_97_MOESM1_ESM.pdf/9539584)

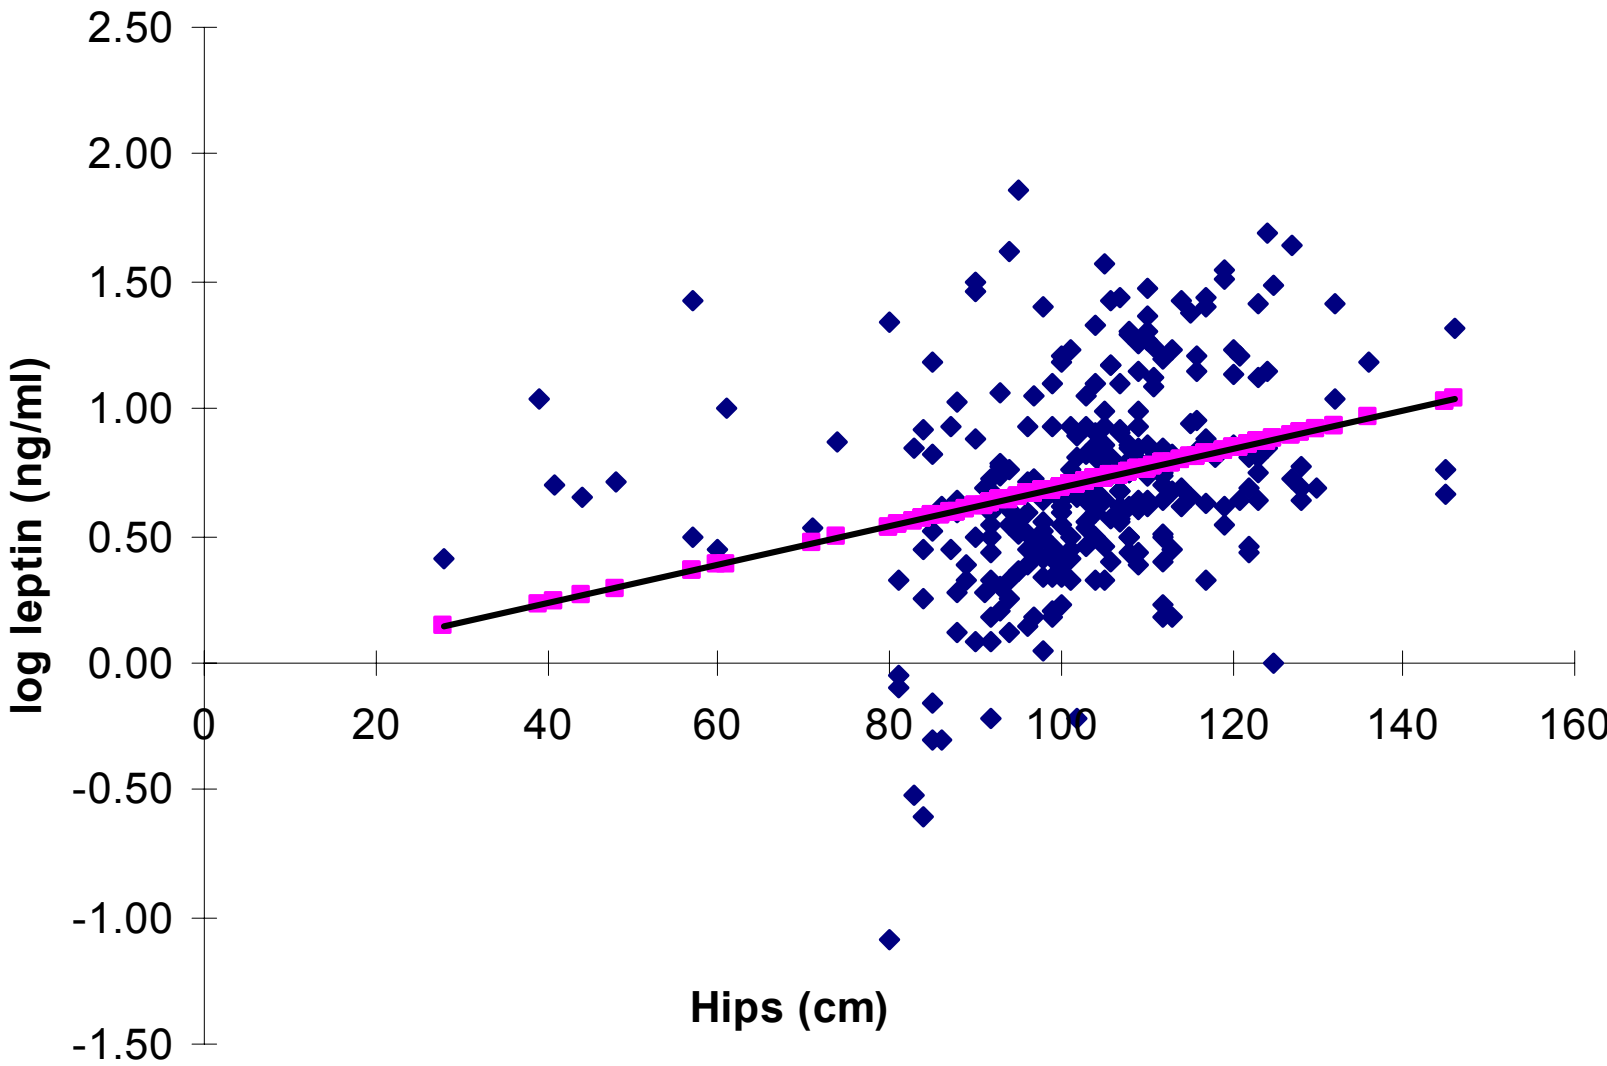

Supplement: MOESM1 [file 9539584]
